# Supplementary material
Source: Springer Nature journal article supplement (https://www.springermedizin.de/resource/supplementary/12916_2013_1095_MOESM1_ESM.pdf/9598440)

**Additional File 1.** Flow Chart of Participants: The PREDIMED Study.

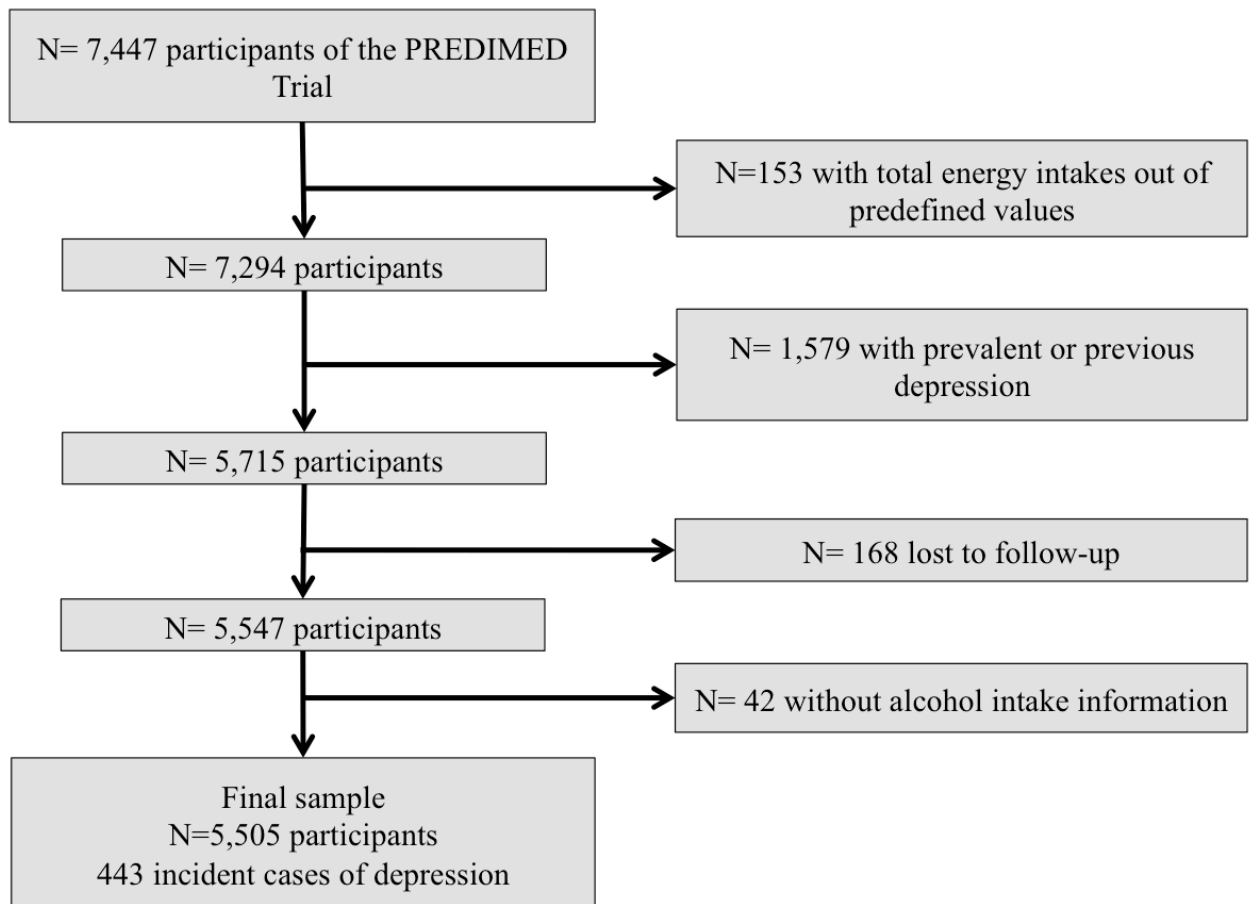

Supplement: MOESM1 [file 9598440]
